# Supplementary material for: The Effects of the Fungicide Myclobutanil on Soil Enzyme Activity
Source: MDPI journal article supplement (doi:10.3390/agriculture13101956), 2023-10-07
Supplement: s1 [file s1]

Archive with 1 entries (1 files):
- agriculture-2631262-supplementary.pdf
